# Supplementary material
Source: publisher site journal article supplement (https://www.dovepress.com/article/589098)
Supplement: Supplementary file 1 [file 589098_Supplementary%20materials_1.pdf]

**Supplementary Table 1. Descriptive Statistics of 39 Blood Metabolites in HCC Patients and Matched Healthy Controls Based on NMR Metabolomics.**

| <b>Index</b>                   | <b>Healthy Controls</b> | <b>HCC Patients</b> |
|--------------------------------|-------------------------|---------------------|
| 2-Aminobutyric acid (mmol/L)   | 0.02 (0.01, 0.02)       | 0.01 (0, 0.02)      |
| 2-Hydroxybutyric acid (mmol/L) | 0 (0, 0.01)             | 0.03 (0.02, 0.07)   |
| 2-Oxoglutaric acid (mmol/L)    | 0 (0, 0)                | 0.01 (0, 0.02)      |
| 3-Hydroxybutyric acid (mmol/L) | 0.03 (0.02, 0.05)       | 0.04 (0.02, 0.12)   |
| Acetic acid (mmol/L)           | 0 (0, 0.01)             | 0.03 (0.02, 0.04)   |
| Acetoacetic acid (mmol/L)      | 0.01 (0.01, 0.01)       | 0.01 (0.01, 0.02)   |
| Acetone (mmol/L)               | 0.03 (0.02, 0.05)       | 0.02 (0.01, 0.03)   |
| Alanine (mmol/L)               | 0.44 (0.38, 0.52)       | 0.36 (0.31, 0.4)    |
| Asparagine (mmol/L)            | 0.06 (0.05, 0.07)       | 0.11 (0.09, 0.13)   |
| Choline (mmol/L)               | 0.04 (0.03, 0.06)       | 0.87 (0.09, 1.85)   |
| Citric acid (mmol/L)           | 0.19 (0.18, 0.2)        | 0.13 (0.11, 0.15)   |
| Creatine (mmol/L)              | 0.01 (0.01, 0.02)       | 0.03 (0.02, 0.04)   |
| Creatinine (mmol/L)            | 0.07 (0.06, 0.08)       | 0.07 (0.06, 0.08)   |
| D-Galactose (mmol/L)           | 0.06 (0, 0.33)          | 0 (0, 0.01)         |
| Dimethylsulfone (mmol/L)       | 0.01 (0, 0.01)          | 0 (0, 0)            |
| Ethanol (mmol/L)               | 0.02 (0, 0.05)          | 0.11 (0.04, 0.24)   |
| Formic acid (mmol/L)           | 0.02 (0.02, 0.02)       | 0.02 (0.01, 0.02)   |
| Glucose (mmol/L)               | 5.13 (4.67, 5.81)       | 3.6 (2.96, 4.42)    |
| Glutamic acid (mmol/L)         | 0.14 (0.13, 0.17)       | 0.44 (0.32, 0.55)   |
| Glutamine (mmol/L)             | 0.67 (0.61, 0.72)       | 0.32 (0.22, 0.51)   |
| Glycerol (mmol/L)              | 0.17 (0.14, 0.22)       | 0 (0, 0.03)         |
| Glycine (mmol/L)               | 0.25 (0.23, 0.27)       | 0.57 (0.5, 0.67)    |
| Histidine (mmol/L)             | 0.09 (0.08, 0.09)       | 0.13 (0.11, 0.15)   |
| Isoleucine (mmol/L)            | 0.06 (0.05, 0.07)       | 0.05 (0.04, 0.05)   |
| Lactic acid (mmol/L)           | 2.34 (1.95, 2.66)       | 3.32 (2.56, 4.19)   |
| Leucine (mmol/L)               | 0.12 (0.1, 0.13)        | 0.08 (0.07, 0.1)    |
| Lysine (mmol/L)                | 0.2 (0.19, 0.21)        | 0.23 (0.19, 0.29)   |
| Methionine (mmol/L)            | 0.03 (0.02, 0.05)       | 0.02 (0.01, 0.04)   |

| <b>Index</b>                    | <b>Healthy Controls</b> | <b>HCC Patients</b> |
|---------------------------------|-------------------------|---------------------|
| N, N-Dimethylglycine (mmol/L)   | 0 (0, 0.01)             | 0.01 (0.01, 0.02)   |
| Ornithine (mmol/L)              | 0.06 (0.05, 0.07)       | 0.16 (0.09, 0.21)   |
| Phenylalanine (mmol/L)          | 0.05 (0.04, 0.05)       | 0.05 (0.05, 0.05)   |
| Proline (mmol/L)                | 0.33 (0.27, 0.4)        | 0.19 (0.13, 0.25)   |
| Pyruvic acid (mmol/L)           | 0.13 (0.11, 0.16)       | 0.17 (0.13, 0.22)   |
| Sarcosine (mmol/L)              | 0.02 (0.01, 0.02)       | 0 (0, 0)            |
| Succinic acid (mmol/L)          | 0.01 (0, 0.01)          | 0.01 (0.01, 0.05)   |
| Threonine (mmol/L)              | 0.28 (0.2, 0.42)        | 0.1 (0.05, 0.13)    |
| Trimethylamine-N-oxide (mmol/L) | 0.03 (0.02, 0.04)       | 0.03 (0, 0.04)      |
| Tyrosine (mmol/L)               | 0.05 (0.05, 0.06)       | 0.04 (0.04, 0.04)   |
| Valine (mmol/L)                 | 0.26 (0.24, 0.29)       | 0.21 (0.18, 0.25)   |

Abbreviations: HCC, Hepatocellular carcinoma; NMR, Nuclear magnetic resonance.

**Supplementary Table 2. Descriptive Statistics of 112 blood-lipid indicators in HCC Patients and Matched Healthy Controls Based on NMR Metabolomics.**

| <b>Index</b>                   | <b>Healthy Controls</b> | <b>HCC Patients</b>  |
|--------------------------------|-------------------------|----------------------|
| Apo-B/Apo-A1 (-/-)             | 0.7 (0.61, 0.78)        | 0.62 (0.46, 0.78)    |
| HDL-1 Apo-A1 (mg/dL)           | 17.05 (12.88, 21.71)    | 31.28 (24.23, 43.11) |
| HDL-1 Apo-A2 (mg/dL)           | 0.62 (0.16, 1.37)       | 2.42 (1.77, 3.37)    |
| HDL-1 Cholesterol (mg/dL)      | 13.26 (11.09, 16.65)    | 27.98 (21.5, 35.61)  |
| HDL-1 Free Cholesterol (mg/dL) | 3.09 (2.32, 3.72)       | 5.64 (4.09, 6.82)    |
| HDL-1 Phospholipids (mg/dL)    | 13.81 (10.78, 17.11)    | 28.52 (23.11, 37.2)  |
| HDL-1 Triglycerides (mg/dL)    | 3.36 (2.43, 4.89)       | 2.32 (0.13, 3.94)    |
| HDL-2 Apo-A1 (mg/dL)           | 11.32 (9.12, 14.5)      | 18.12 (14.96, 21.25) |
| HDL-2 Apo-A2 (mg/dL)           | 1.44 (1.01, 2.3)        | 2.78 (1.77, 3.53)    |
| HDL-2 Cholesterol (mg/dL)      | 6.29 (5.08, 7.75)       | 11.1 (9.43, 13.85)   |
| HDL-2 Free Cholesterol (mg/dL) | 1.06 (0.66, 1.42)       | 2.11 (1.6, 2.87)     |
| HDL-2 Phospholipids (mg/dL)    | 8.71 (6.74, 11.27)      | 16.21 (13, 19.24)    |
| HDL-2 Triglycerides (mg/dL)    | 1.76 (1.39, 2.46)       | 1.29 (0.29, 2.37)    |
| HDL-3 Apo-A1 (mg/dL)           | 20.55 (18.09, 23.94)    | 23.6 (19.76, 27.25)  |
| HDL-3 Apo-A2 (mg/dL)           | 4.48 (3.63, 5.28)       | 6.51 (4.81, 7.77)    |
| HDL-3 Cholesterol (mg/dL)      | 7.72 (6.77, 9.03)       | 10.8 (9.48, 12.48)   |
| HDL-3 Free Cholesterol (mg/dL) | 1.45 (0.98, 1.85)       | 1.45 (0.74, 2.11)    |
| HDL-3 Phospholipids (mg/dL)    | 11.46 (9.38, 13.86)     | 16.68 (14.33, 19.18) |
| HDL-3 Triglycerides (mg/dL)    | 1.94 (1.56, 2.56)       | 1.88 (1.11, 2.6)     |
| HDL-4 Apo-A1 (mg/dL)           | 79.03 (69.68, 84.88)    | 51.39 (38.8, 63.51)  |
| HDL-4 Apo-A2 (mg/dL)           | 19.27 (16.82, 20.91)    | 12.58 (8.07, 17.05)  |
| HDL-4 Cholesterol (mg/dL)      | 20.45 (16.72, 22.54)    | 14.83 (9.43, 18.4)   |
| HDL-4 Free Cholesterol (mg/dL) | 3.67 (2.83, 4.24)       | 2.49 (1.34, 3.95)    |
| HDL-4 Phospholipids (mg/dL)    | 25.48 (22.48, 27.6)     | 19.24 (15.75, 22.89) |

| <b>Index</b>                   | <b>Healthy Controls</b> | <b>HCC Patients</b>     |
|--------------------------------|-------------------------|-------------------------|
| HDL-4 Triglycerides (mg/dL)    | 3.67 (3.07, 4.46)       | 2.81 (1.92, 3.59)       |
| HDL Apo-A1 (mg/dL)             | 130.14 (121.23, 147.25) | 128.5 (114.43, 142.76)  |
| HDL Apo-A2 (mg/dL)             | 28.34 (26.32, 31.47)    | 31.19 (24.47, 35.05)    |
| HDL-C (mg/dL)                  | 48.4 (43.18, 55.5)      | 66.61 (57.04, 76.28)    |
| HDL Free Cholesterol (mg/dL)   | 10.58 (8.96, 12.59)     | 14.66 (12.18, 18.6)     |
| HDL Phospholipids (mg/dL)      | 59.66 (52.63, 68.33)    | 80.38 (70.84, 93.52)    |
| HDL Triglycerides (mg/dL)      | 10.64 (8.65, 14.27)     | 7.22 (2.7, 11.39)       |
| IDL Apo-B (mg/dL)              | 3.2 (2.45, 4.14)        | 3.08 (1.5, 4.84)        |
| IDL Cholesterol (mg/dL)        | 10.63 (7.97, 12.59)     | 2.3 (0.23, 5.58)        |
| IDL Free Cholesterol (mg/dL)   | 3.34 (2.25, 4.07)       | 0.5 (0, 1.14)           |
| IDL Phospholipids (mg/dL)      | 7.02 (4.64, 10.12)      | 3.4 (1.37, 5.5)         |
| IDL Particle Number (nmol/L)   | 58.04 (44.48, 75.25)    | 55.95 (27.23, 88.03)    |
| IDL Triglycerides (mg/dL)      | 9.38 (3.5, 18.46)       | 4.22 (2.37, 8.05)       |
| LDL-1 Apo-B (mg/dL)            | 10.61 (8.44, 13.07)     | 9 (5.55, 13.83)         |
| LDL-1 Cholesterol (mg/dL)      | 20.56 (16.21, 25.17)    | 9.27 (4.93, 17.97)      |
| LDL-1 Free Cholesterol (mg/dL) | 6.04 (4.86, 7.68)       | 4.84 (3.04, 7.28)       |
| LDL-1 Phospholipids (mg/dL)    | 11.32 (9.28, 13.66)     | 8.14 (5.59, 13.53)      |
| LDL-1 Particle Number (nmol/L) | 192.77 (153.38, 237.71) | 163.64 (100.88, 251.51) |
| LDL-1 Triglycerides (mg/dL)    | 4.7 (3.42, 6.32)        | 5.7 (4.02, 8.45)        |
| LDL-2 Apo-B (mg/dL)            | 8.84 (6.73, 10.69)      | 0 (0, 4.28)             |
| LDL-2 Cholesterol (mg/dL)      | 15.03 (10.88, 19.48)    | 0 (0, 7.69)             |
| LDL-2 Free Cholesterol (mg/dL) | 4.98 (3.54, 6.05)       | 1.53 (0, 4.86)          |
| LDL-2 Phospholipids (mg/dL)    | 8.48 (6.47, 10.46)      | 0 (0, 5.29)             |
| LDL-2 Particle Number (nmol/L) | 160.78 (122.36, 194.29) | 0 (0, 77.67)            |
| LDL-2 Triglycerides (mg/dL)    | 1.99 (1.62, 2.4)        | 2.3 (1.12, 3.63)        |
| LDL-3 Apo-B (mg/dL)            | 9.67 (7.16, 11.91)      | 1.29 (0, 3.87)          |

| <b>Index</b>                   | <b>Healthy Controls</b> | <b>HCC Patients</b>     |
|--------------------------------|-------------------------|-------------------------|
| LDL-3 Cholesterol (mg/dL)      | 16.45 (11.47, 21.31)    | 0 (0, 0.62)             |
| LDL-3 Free Cholesterol (mg/dL) | 5.44 (4.16, 7.15)       | 3.8 (2.46, 4.93)        |
| LDL-3 Phospholipids (mg/dL)    | 8.95 (6.7, 11.38)       | 0.43 (0, 2.64)          |
| LDL-3 Particle Number (nmol/L) | 175.86 (130.33, 216.51) | 23.39 (0, 70.3)         |
| LDL-3 Triglycerides (mg/dL)    | 1.5 (0.78, 1.9)         | 3.25 (2.48, 3.96)       |
| LDL-4 Apo-B (mg/dL)            | 10.68 (7.32, 13.58)     | 1.14 (0, 6.35)          |
| LDL-4 Cholesterol (mg/dL)      | 17.58 (11.47, 22.59)    | 0 (0, 4.59)             |
| LDL-4 Free Cholesterol (mg/dL) | 5.56 (4.13, 6.92)       | 2.34 (0.76, 4.49)       |
| LDL-4 Phospholipids (mg/dL)    | 9.61 (6.74, 12.07)      | 0.44 (0, 4.28)          |
| LDL-4 Particle Number (nmol/L) | 194.22 (132.97, 246.93) | 20.77 (0, 115.5)        |
| LDL-4 Triglycerides (mg/dL)    | 1.95 (1.47, 2.53)       | 3.67 (2.01, 5.24)       |
| LDL-5 Apo-B (mg/dL)            | 13.18 (9.89, 16.8)      | 18.22 (10.55, 25.06)    |
| LDL-5 Cholesterol (mg/dL)      | 19.2 (14.08, 24.08)     | 21.8 (11.9, 33.51)      |
| LDL-5 Free Cholesterol (mg/dL) | 5.41 (3.85, 6.36)       | 7.63 (4.55, 10.63)      |
| LDL-5 Phospholipids (mg/dL)    | 10.41 (7.68, 12.62)     | 12.74 (8.02, 18.26)     |
| LDL-5 Particle Number (nmol/L) | 239.62 (179.91, 305.54) | 331.23 (191.8, 455.65)  |
| LDL-5 Triglycerides (mg/dL)    | 2.49 (1.66, 3.19)       | 5.82 (3.48, 7.91)       |
| LDL-6 Apo-B (mg/dL)            | 21.02 (16.48, 25.99)    | 29.66 (21.45, 38.89)    |
| LDL-6 Cholesterol (mg/dL)      | 25.31 (19.55, 31.77)    | 39.09 (28.16, 52.21)    |
| LDL-6 Free Cholesterol (mg/dL) | 6.3 (5.26, 7.85)        | 10.87 (7.49, 14.14)     |
| LDL-6 Phospholipids (mg/dL)    | 13.35 (10.56, 16.39)    | 22.86 (17.24, 29.48)    |
| LDL-6 Particle Number (nmol/L) | 382.33 (299.76, 472.49) | 539.41 (390.11, 707.18) |
| LDL-6 Triglycerides (mg/dL)    | 3.62 (2.84, 4.66)       | 7.44 (5.73, 9.75)       |
| LDL Apo-B (mg/dL)              | 75.68 (63.01, 85.6)     | 62.36 (45.95, 87.48)    |
| LDL-C (mg/dL)                  | 117.17 (95.96, 134.44)  | 63.94 (44.84, 88.95)    |
| LDL Free Cholesterol (mg/dL)   | 33.7 (27.23, 39.38)     | 24.5 (18.74, 34.22)     |

| <b>Index</b>                    | <b>Healthy Controls</b>    | <b>HCC Patients</b>        |
|---------------------------------|----------------------------|----------------------------|
| LDL-C/HDL-C (-/-)               | 2.3 (1.86, 2.76)           | 1.06 (0.7, 1.29)           |
| LDL Phospholipids (mg/dL)       | 62.92 (52.12, 71.27)       | 45.08 (34.3, 58.67)        |
| LDL Particle Number (nmol/L)    | 1376.21 (1145.71, 1556.39) | 1133.76 (835.54, 1590.72)  |
| LDL Triglycerides (mg/dL)       | 17.84 (15.06, 20.66)       | 29.85 (21, 36.39)          |
| Total Particle Number (nmol/L)  | 1738.87 (1527.45, 1931.77) | 1369.36 (1091.98, 1718.61) |
| Apo-A1 (mg/dL)                  | 137.38 (123.57, 151.86)    | 125.62 (114, 141.3)        |
| Apo-A2 (mg/dL)                  | 27.75 (25.44, 30.79)       | 27.81 (21.87, 32.13)       |
| Apo-B (mg/dL)                   | 95.64 (84.01, 106.24)      | 75.32 (60.06, 94.52)       |
| TC (mg/dL)                      | 118.6 (76.75, 180.19)      | 139.29 (115.08, 169.45)    |
| TG (mg/dL)                      | 201.73 (180.82, 222.83)    | 87.83 (73.68, 118.1)       |
| VLDL-1 Cholesterol (mg/dL)      | 6.55 (2.95, 13.35)         | 3.16 (1.37, 5.81)          |
| VLDL-1 Free Cholesterol (mg/dL) | 2.71 (1.11, 5.58)          | 0.15 (0, 1.19)             |
| VLDL-1 Phospholipids (mg/dL)    | 6.38 (3.2, 12.09)          | 7.62 (6, 9.75)             |
| VLDL-1 Triglycerides (mg/dL)    | 34.34 (17.66, 67.82)       | 45.36 (36.38, 54.46)       |
| VLDL-2 Cholesterol (mg/dL)      | 3.56 (1.83, 5.4)           | 1.02 (0.15, 2.67)          |
| VLDL-2 Free Cholesterol (mg/dL) | 1.77 (0.82, 2.92)          | 0 (0, 0.38)                |
| VLDL-2 Phospholipids (mg/dL)    | 4.04 (2.18, 6.24)          | 2.24 (1.37, 3.67)          |
| VLDL-2 Triglycerides (mg/dL)    | 14.86 (8.12, 23.45)        | 10.98 (7.52, 16.5)         |
| VLDL-3 Cholesterol (mg/dL)      | 4.44 (2.37, 6.56)          | 0.36 (0, 1.72)             |
| VLDL-3 Free Cholesterol (mg/dL) | 2.18 (1.02, 3.34)          | 0.5 (0.16, 1.34)           |
| VLDL-3 Phospholipids (mg/dL)    | 4.58 (2.84, 6.49)          | 1.54 (0.45, 3.18)          |
| VLDL-3 Triglycerides (mg/dL)    | 13.39 (8.2, 18.72)         | 7.15 (4.89, 11.25)         |
| VLDL-4 Cholesterol (mg/dL)      | 4.11 (2.88, 5.75)          | 2.76 (1.45, 4.05)          |
| VLDL-4 Free Cholesterol (mg/dL) | 1.92 (1.31, 2.82)          | 0.36 (0, 0.98)             |
| VLDL-4 Phospholipids (mg/dL)    | 4.12 (3.2, 5.33)           | 2.65 (1.67, 3.81)          |
| VLDL-4 Triglycerides (mg/dL)    | 8.71 (6.72, 11.13)         | 7.38 (5.16, 9.88)          |

| <b>Index</b>                    | <b>Healthy Controls</b> | <b>HCC Patients</b>   |
|---------------------------------|-------------------------|-----------------------|
| VLDL-5 Cholesterol (mg/dL)      | 1.52 (1.17, 1.93)       | 1.38 (0.65, 1.91)     |
| VLDL-5 Free Cholesterol (mg/dL) | 0.2 (0, 0.44)           | 0.44 (0, 1)           |
| VLDL-5 Phospholipids (mg/dL)    | 1.87 (1.46, 2.27)       | 1.42 (0.76, 2.19)     |
| VLDL-5 Triglycerides (mg/dL)    | 2.1 (1.77, 2.72)        | 3.58 (3.09, 4.47)     |
| VLDL Apo-B (mg/dL)              | 9.5 (6.24, 12.7)        | 6.5 (5.17, 9.12)      |
| VLDL Cholesterol (mg/dL)        | 22.73 (13.13, 31.12)    | 5.31 (0.4, 10.99)     |
| VLDL Free Cholesterol (mg/dL)   | 10.34 (6.82, 14.15)     | 5.37 (2.79, 7.74)     |
| VLDL Phospholipids (mg/dL)      | 22.6 (14.47, 30.3)      | 18.35 (14.09, 25.29)  |
| VLDL Particle Number (nmol/L)   | 172.68 (113.52, 230.83) | 118.12 (93.9, 165.92) |
| VLDL Triglycerides (mg/dL)      | 82.76 (52.91, 132.6)    | 70.5 (59.11, 93.46)   |

Abbreviations: HCC, Hepatocellular carcinoma; NMR, Nuclear magnetic resonance; Apo, Apolipoprotein; HDL, High-density lipoprotein; HDL-C, High-density lipoprotein cholesterol; IDL, Intermediate-density lipoprotein; LDL, Low-density lipoprotein; LDL-C, Low-density lipoprotein cholesterol; VLDL, Very low-density lipoprotein; TC, Total cholesterol; TG, Triglycerides.

**Supplementary Table 3. Comparative Analysis of 151 Metabolic Indexes in HCC Patients and Matched Healthy Controls Based on NMR Metabolomics.**

| Index                   | log2_FC_median | FC_median   | Pvalue      | VIP         |
|-------------------------|----------------|-------------|-------------|-------------|
| Glycine                 | 1.212386511    | 2.317206329 | 6.02522E-31 | 1.776652405 |
| Glycerol                | -inf           | 0           | 5.2413E-29  | 1.767487765 |
| LDL-3 Cholesterol       | -inf           | 0           | 6.3895E-28  | 1.665220819 |
| TG                      | -1.199639939   | 0.435383929 | 4.71445E-26 | 1.651551402 |
| Glutamic acid           | 1.629628516    | 3.094333116 | 6.24298E-23 | 1.624720029 |
| Glutamine               | -1.05283892    | 0.482018719 | 2.63862E-24 | 1.617647759 |
| LDL-3 Phospholipids     | -4.396352936   | 0.047486034 | 8.62547E-25 | 1.601802152 |
| LDL-C/HDL-C             | -1.127523752   | 0.457700651 | 9.49599E-24 | 1.556414652 |
| Citric acid             | -0.510795598   | 0.701835292 | 3.64477E-25 | 1.516637464 |
| LDL-3 Particle Number   | -2.910422588   | 0.133007307 | 8.94639E-23 | 1.512571143 |
| LDL-3 Apo-B             | -2.906144824   | 0.133402275 | 8.943E-23   | 1.512564236 |
| Histidine               | 0.570992837    | 1.485545545 | 5.95579E-25 | 1.506028483 |
| LDL-4 Cholesterol       | -inf           | 0           | 2.57128E-21 | 1.501696251 |
| Asparagine              | 0.776302649    | 1.71273583  | 6.42957E-20 | 1.488685954 |
| LDL-3 Triglycerides     | 1.120294234    | 2.173913043 | 1.0642E-23  | 1.460943792 |
| LDL-6 Triglycerides     | 1.041306974    | 2.058091286 | 1.8671E-23  | 1.456243706 |
| Ornithine               | 1.459023388    | 2.749221959 | 9.16863E-25 | 1.446145414 |
| LDL-4 Phospholipids     | -4.464698308   | 0.045288912 | 1.05384E-18 | 1.439576619 |
| N,N-Dimethylglycine     | 1.647806397    | 3.133568208 | 2.61331E-20 | 1.417632837 |
| HDL-1 Cholesterol       | 1.077057356    | 2.109728507 | 1.4519E-21  | 1.357700068 |
| HDL-1 Phospholipids     | 1.045485471    | 2.064060803 | 8.50226E-22 | 1.348219186 |
| HDL-4 Apo-A1            | -0.620821478   | 0.650300538 | 3.69091E-19 | 1.327871684 |
| Tyrosine                | -0.418637325   | 0.748130926 | 5.51368E-20 | 1.320144814 |
| HDL-2 Phospholipids     | 0.896139467    | 1.861079219 | 1.09015E-18 | 1.316934052 |
| HDL-2 Cholesterol       | 0.819427754    | 1.764705882 | 2.53121E-19 | 1.314466006 |
| IDL Free Cholesterol    | -2.756505781   | 0.147982063 | 4.46892E-22 | 1.283729554 |
| HDL-2 Apo-A1            | 0.678469945    | 1.600441501 | 8.9861E-17  | 1.268056069 |
| VLDL-2 Free Cholesterol | -inf           | 0           | 3.12305E-21 | 1.259492115 |
| Proline                 | -0.749658354   | 0.594744383 | 3.13658E-16 | 1.25316642  |
| HDL-1 Apo-A2            | 1.973364873    | 3.926829268 | 4.41941E-19 | 1.250366525 |
| LDL-4 Apo-B             | -3.227805918   | 0.106741573 | 9.29167E-15 | 1.249949933 |
| LDL-4 Particle Number   | -3.22511865    | 0.106940583 | 9.29194E-15 | 1.249905664 |
| LDL-5 Triglycerides     | 1.227773301    | 2.342052314 | 4.25865E-16 | 1.237303479 |
| VLDL-3 Cholesterol      | -3.622865293   | 0.081172492 | 7.10305E-18 | 1.225023224 |
| Threonine               | -1.545752064   | 0.342517104 | 3.30957E-21 | 1.224746098 |
| Choline                 | 4.388290058    | 20.94145906 | 1.48481E-18 | 1.219399317 |
| HDL Phospholipids       | 0.429982855    | 1.347217566 | 5.89677E-17 | 1.216457959 |
| LDL-C                   | -0.873812583   | 0.545702825 | 1.11839E-14 | 1.214181572 |
| HDL-2 Free Cholesterol  | 1              | 2           | 2.40107E-14 | 1.195735713 |
| Sarcosine               | -3.761996522   | 0.073709965 | 1.22293E-23 | 1.191852884 |

| Index                   | log2_FC_median | FC_median   | Pvalue      | VIP         |
|-------------------------|----------------|-------------|-------------|-------------|
| IDL Cholesterol         | -2.211575538   | 0.215898401 | 1.30902E-18 | 1.188034883 |
| HDL-1 Free Cholesterol  | 0.869366743    | 1.826860841 | 2.36994E-15 | 1.183043522 |
| VLDL-5 Triglycerides    | 0.767553914    | 1.702380952 | 1.46106E-16 | 1.177351207 |
| 2-Hydroxybutyric acid   | 3.493052083    | 11.25935347 | 4.301E-27   | 1.167192701 |
| HDL-C                   | 0.460731734    | 1.376239669 | 1.7352E-15  | 1.166865522 |
| HDL-3 Phospholipids     | 0.540882934    | 1.454862625 | 1.25985E-14 | 1.166283684 |
| Creatine                | 1.222510334    | 2.333524046 | 4.06464E-14 | 1.165163256 |
| LDL Triglycerides       | 0.742615316    | 1.673206278 | 4.81656E-15 | 1.152913659 |
| VLDL Cholesterol        | -2.096456087   | 0.23383194  | 2.84888E-16 | 1.13799425  |
| 2-Oxoglutaric acid      | 2.352990842    | 5.108822606 | 1.41129E-16 | 1.133488356 |
| HDL-4 Apo-A2            | -0.615224649   | 0.65282823  | 4.71522E-14 | 1.118984545 |
| LDL-6 Phospholipids     | 0.775985662    | 1.712359551 | 2.48576E-14 | 1.113851726 |
| HDL-1 Apo-A1            | 0.876122505    | 1.835435612 | 6.96946E-16 | 1.104663619 |
| VLDL-3 Phospholipids    | -1.573991383   | 0.335877863 | 5.70847E-13 | 1.101855459 |
| HDL-3 Cholesterol       | 0.484625181    | 1.399222294 | 3.28006E-12 | 1.076351175 |
| Leucine                 | -0.452153916   | 0.730950738 | 1.59521E-13 | 1.071134705 |
| VLDL-3 Free Cholesterol | -2.113277987   | 0.231121281 | 1.4307E-12  | 1.05919057  |
| LDL-6 Free Cholesterol  | 0.785783665    | 1.724028549 | 2.10319E-12 | 1.056872846 |
| Lactic acid             | 0.505167153    | 1.419287788 | 7.10764E-10 | 1.043315199 |
| LDL-4 Free Cholesterol  | -1.250364362   | 0.420342034 | 3.18758E-10 | 1.042584065 |
| VLDL-4 Free Cholesterol | -2.41127558    | 0.187989556 | 5.06799E-16 | 1.041075551 |
| VLDL-2 Cholesterol      | -1.798278167   | 0.287517532 | 5.75547E-11 | 1.037339182 |
| LDL-2 Apo-B             | -inf           | 0           | 1.87783E-17 | 1.035248149 |
| LDL-2 Particle Number   | -inf           | 0           | 1.85572E-17 | 1.035226771 |
| HDL Free Cholesterol    | 0.471037444    | 1.38610586  | 2.50478E-11 | 1.033986723 |
| D-Galactose             | -inf           | 0           | 6.06105E-11 | 1.022456058 |
| LDL-4 Triglycerides     | 0.912305939    | 1.882051282 | 1.16332E-09 | 1.012182959 |
| IDL Phospholipids       | -1.047031529   | 0.483962937 | 1.52888E-11 | 0.981404559 |
| VLDL-1 Free Cholesterol | -4.226827393   | 0.053406998 | 1.57852E-16 | 0.976298184 |
| VLDL Free Cholesterol   | -0.945242192   | 0.51934236  | 1.02854E-10 | 0.968157786 |
| HDL-4 Cholesterol       | -0.463582245   | 0.725183374 | 1.2638E-11  | 0.968006162 |
| VLDL-2 Phospholipids    | -0.849424258   | 0.55500618  | 1.83073E-06 | 0.966670642 |
| LDL-2 Phospholipids     | -inf           | 0           | 1.37526E-15 | 0.963273759 |
| HDL-4 Triglycerides     | -0.385209933   | 0.765667575 | 2.11065E-07 | 0.961450542 |
| LDL-2 Cholesterol       | -inf           | 0           | 1.63445E-17 | 0.95989635  |
| VLDL-3 Triglycerides    | -0.904670909   | 0.534154535 | 1.53128E-07 | 0.951239573 |
| HDL-3 Apo-A2            | 0.539158811    | 1.453125    | 2.64955E-09 | 0.950491972 |
| Alanine                 | -0.292242149   | 0.816631912 | 2.24436E-10 | 0.949574667 |
| LDL-1 Cholesterol       | -1.149549828   | 0.450765864 | 1.23572E-12 | 0.945992976 |
| LDL-6 Cholesterol       | 0.626991624    | 1.5443413   | 1.11704E-09 | 0.944810508 |
| Succinic acid           | 0.240637527    | 1.181514657 | 7.15233E-05 | 0.941883513 |
| HDL-4 Phospholipids     | -0.404598475   | 0.755446516 | 6.0873E-11  | 0.940081786 |
| LDL-3 Free Cholesterol  | -0.51893263    | 0.697887971 | 5.86336E-09 | 0.903121569 |
| HDL-2 Apo-A2            | 0.941418279    | 1.920415225 | 4.12104E-08 | 0.888093719 |

| Index                   | log2_FC_median | FC_median   | Pvalue      | VIP         |
|-------------------------|----------------|-------------|-------------|-------------|
| VLDL-5 Free Cholesterol | 1.1740294      | 2.256410256 | 0.005502411 | 0.863460768 |
| Valine                  | -0.298013991   | 0.81337131  | 8.86157E-09 | 0.855156318 |
| Isoleucine              | -0.33463177    | 0.792986511 | 8.67211E-08 | 0.841109757 |
| VLDL Apo-B              | -0.547838475   | 0.684044234 | 0.000165671 | 0.834283188 |
| VLDL Particle Number    | -0.547805962   | 0.68405965  | 0.000167527 | 0.834224573 |
| VLDL-2 Triglycerides    | -0.435899246   | 0.73923284  | 0.024849575 | 0.829042101 |
| LDL-5 Free Cholesterol  | 0.496054463    | 1.410351201 | 3.23713E-06 | 0.819423938 |
| LDL Phospholipids       | -0.481191179   | 0.716385887 | 4.63757E-08 | 0.811367294 |
| Acetic acid             | 2.865684676    | 7.288816985 | 3.08328E-28 | 0.809373454 |
| VLDL-1 Cholesterol      | -1.053854901   | 0.481679389 | 6.62203E-07 | 0.804682054 |
| LDL-6 Apo-B             | 0.496655982    | 1.410939358 | 5.0468E-07  | 0.796318015 |
| LDL-6 Particle Number   | 0.49656386     | 1.410849266 | 5.01072E-07 | 0.796287506 |
| Lysine                  | 0.190384939    | 1.141068134 | 8.47382E-06 | 0.784337064 |
| Pyruvic acid            | 0.368882972    | 1.291352595 | 2.18374E-05 | 0.768234776 |
| IDL Triglycerides       | -1.151575692   | 0.450133333 | 9.84672E-05 | 0.739581352 |
| HDL Triglycerides       | -0.559427409   | 0.678571429 | 1.46042E-06 | 0.738167838 |
| VLDL Phospholipids      | -0.30054271    | 0.811946903 | 0.100096149 | 0.722444392 |
| LDL-2 Free Cholesterol  | -1.702614089   | 0.307228916 | 2.59725E-08 | 0.708571212 |
| Dimethylsulfone         | -inf           | 0           | 1.71788E-34 | 0.705866949 |
| LDL-5 Apo-B             | 0.467172589    | 1.382397572 | 0.000215619 | 0.676092555 |
| LDL-5 Particle Number   | 0.467054914    | 1.38228482  | 0.000215628 | 0.676075086 |
| VLDL-4 Phospholipids    | -0.636651978   | 0.643203883 | 1.15767E-07 | 0.660779747 |
| Glucose                 | -0.510824189   | 0.701821384 | 7.45572E-17 | 0.658602964 |
| Apo-B                   | -0.344601479   | 0.787525488 | 9.57483E-06 | 0.658582028 |
| Total Particle Number   | -0.344649422   | 0.787499317 | 9.63672E-06 | 0.658549655 |
| Formic acid             | -0.123164582   | 0.918171412 | 0.004222214 | 0.630103505 |
| VLDL Triglycerides      | -0.231310388   | 0.851860802 | 0.223726364 | 0.61640801  |
| VLDL-1 Phospholipids    | 0.256234574    | 1.194357367 | 0.054529005 | 0.608085117 |
| Acetoacetic acid        | 0.916125906    | 1.887041179 | 3.63084E-13 | 0.606779933 |
| Apo-A1                  | -0.129053307   | 0.914431301 | 0.000573607 | 0.597248872 |
| HDL-3 Free Cholesterol  | 0              | 1           | 0.884430919 | 0.594012678 |
| LDL-5 Phospholipids     | 0.292088313    | 1.224411341 | 0.003763986 | 0.575078194 |
| LDL Free Cholesterol    | -0.459966842   | 0.727002967 | 0.000169385 | 0.541589561 |
| Ethanol                 | 2.372091018    | 5.176909215 | 2.08801E-11 | 0.526200947 |
| LDL-1 Phospholipids     | -0.474887354   | 0.719522968 | 6.07355E-05 | 0.51988244  |
| VLDL-5 Phospholipids    | -0.393284701   | 0.761394102 | 0.002069237 | 0.507914592 |
| VLDL-4 Cholesterol      | -0.574470127   | 0.671532847 | 2.48268E-05 | 0.503365822 |
| HDL-3 Apo-A1            | 0.199954089    | 1.1486618   | 0.005399679 | 0.49278949  |
| 2-Aminobutyric acid     | -0.534195558   | 0.690543614 | 0.001096763 | 0.48060099  |
| LDL-1 Triglycerides     | 0.278570684    | 1.212992545 | 0.01827355  | 0.477508602 |
| HDL-4 Free Cholesterol  | -0.564498398   | 0.676190476 | 0.000394839 | 0.472508024 |
| VLDL-4 Triglycerides    | -0.238074798   | 0.847876005 | 0.010912413 | 0.471575029 |
| VLDL-1 Triglycerides    | 0.401320556    | 1.320716261 | 0.013693781 | 0.470562406 |
| HDL-2 Triglycerides     | -0.442623331   | 0.735795455 | 0.005272484 | 0.453758087 |

| <b>Index</b>           | <b>log2_FC_median</b> | <b>FC_median</b> | <b>Pvalue</b> | <b>VIP</b>  |
|------------------------|-----------------------|------------------|---------------|-------------|
| LDL Particle Number    | -0.279578994          | 0.823831392      | 0.010404617   | 0.44815862  |
| LDL Apo-B              | -0.279502152          | 0.823875273      | 0.010446084   | 0.44815388  |
| HDL-1 Triglycerides    | -0.532187961          | 0.691505216      | 0.000244056   | 0.444103815 |
| LDL-5 Cholesterol      | 0.182846171           | 1.135121062      | 0.102657929   | 0.435869911 |
| HDL Apo-A2             | 0.13775799            | 1.100194038      | 0.043291636   | 0.421698347 |
| Methionine             | -0.434595008          | 0.73990143       | 0.002878565   | 0.408128671 |
| LDL-2 Triglycerides    | 0.205245115           | 1.152882206      | 0.081331413   | 0.402990078 |
| 3-Hydroxybutyric acid  | 0.123278213           | 1.08920704       | 0.193693297   | 0.401274873 |
| VLDL-5 Cholesterol     | -0.134649527          | 0.910891089      | 0.031134051   | 0.400569872 |
| LDL-1 Free Cholesterol | -0.320735292          | 0.800661704      | 0.002842512   | 0.386250412 |
| TC                     | 0.231987677           | 1.174451939      | 0.007646788   | 0.351863906 |
| LDL-1 Particle Number  | -0.236436608          | 0.84883932       | 0.011716695   | 0.339708169 |
| LDL-1 Apo-B            | -0.236747714          | 0.848656294      | 0.01167041    | 0.339666201 |
| Apo-A2                 | 0.002856052           | 1.001981625      | 0.707579271   | 0.338873959 |
| HDL Apo-A1             | -0.018239965          | 0.987436607      | 0.09533239    | 0.328582801 |
| Acetone                | -0.759226649          | 0.590812949      | 1.49727E-07   | 0.308045526 |
| Phenylalanine          | 0.089964719           | 1.064344154      | 0.001750502   | 0.301980229 |
| HDL-3 Triglycerides    | -0.05287956           | 0.964010283      | 0.11456661    | 0.272958243 |
| Apo-B/Apo-A1           | -0.185355042          | 0.879432624      | 0.020923081   | 0.228650493 |
| IDL Apo-B              | -0.05288558           | 0.96400626       | 0.189432785   | 0.155958032 |
| IDL Particle Number    | -0.052909388          | 0.963990351      | 0.190843911   | 0.155808846 |
| Creatinine             | -0.116379631          | 0.922499714      | 0.078531667   | 0.110798294 |
| Trimethylamine-N-oxide | -0.057988757          | 0.96060235       | 0.125920035   | 0.051751245 |

Abbreviations: HCC, Hepatocellular carcinoma; NMR, Nuclear magnetic resonance; FC, Fold change; VIP, Variable importance in the projection; Apo, Apolipoprotein; HDL, High-density lipoprotein; HDL-C, High-density lipoprotein cholesterol; IDL, Intermediate-density lipoprotein; LDL, Low-density lipoprotein; LDL-C, Low-density lipoprotein cholesterol; VLDL, Very low-density lipoprotein; TC, Total cholesterol; TG, Triglycerides.

**Supplementary Table 4. Univariate cox regression analysis identified 11 prognostic features.**

| <b>Index</b>           | <b>HR</b>   | <b>HR_lower</b> | <b>HR_upper</b> | <b>Pvalue</b> |
|------------------------|-------------|-----------------|-----------------|---------------|
| HDL-4 Apo-A2           | 0.880779649 | 0.811548695     | 0.955916501     | 0.002370648   |
| HDL-4 Cholesterol      | 0.88909605  | 0.822308159     | 0.961308456     | 0.00317404    |
| HDL-4 Apo-A1           | 0.96592344  | 0.943366089     | 0.989020172     | 0.004031272   |
| VLDL-1 Triglycerides   | 0.950356464 | 0.913480998     | 0.988720521     | 0.011676797   |
| HDL-4 Phospholipids    | 0.905662206 | 0.83816655      | 0.978593134     | 0.012156259   |
| HDL-4 Free Cholesterol | 0.761408909 | 0.602809566     | 0.961735778     | 0.02217497    |
| Tyrosine               | 9.87292E-30 | 1.69434E-55     | 0.000575297     | 0.027353395   |
| 2-Oxoglutaric acid     | 4.56009E+20 | 108.5221716     | 1.91614E+39     | 0.029691214   |
| Lysine                 | 46.66298556 | 1.393051702     | 1563.067773     | 0.031953387   |
| LDL-2 Triglycerides    | 1.289879811 | 1.018988646     | 1.63278554      | 0.034314356   |
| Glycine                | 0.030669229 | 0.00112185      | 0.838437789     | 0.038983495   |

Abbreviations: HR, Hazard ratio; Apo, Apolipoprotein; HDL, High-density lipoprotein; VLDL, Very low-density lipoprotein; LDL, Low-density lipoprotein.

**Supplementary Table 5. Univariate and multivariate Cox regression analyses confirmed the RS derived from the StepCox[forward]+RSF model as an independent prognostic factor.**

| Index                      | Univariate analysis |        | Multivariate analysis |        |
|----------------------------|---------------------|--------|-----------------------|--------|
|                            | HR(95%CI)           | Pvalue | HR(95%CI)             | Pvalue |
| Age                        | 0.98 (0.95-1.01)    | 0.173  |                       |        |
| Gender                     |                     |        |                       |        |
| Male                       | Reference           |        |                       |        |
| Female                     | 1.10 (0.43-2.61)    | 0.896  |                       |        |
| Hepatocirrhosis            |                     |        |                       |        |
| No                         | Reference           |        |                       |        |
| Yes                        | 1.20 (0.56-2.41)    | 0.678  |                       |        |
| AFP                        | 1.00 (1.00-1.00)    | 0.049  | 1.00 (1.00-1.00)      | 0.491  |
| PIVKA-II                   | 1.00 (1.00-1.00)    | 0.726  |                       |        |
| Tumor Size                 | 1.20 (1.11-1.31)    | <0.001 | 1.15 (1.03-1.27)      | 0.01   |
| Tumor Number               |                     |        |                       |        |
| Solitary                   | Reference           |        | Reference             |        |
| Multiple                   | 2.60 (1.22-5.36)    | 0.013  | 0.77 (0.09-6.45)      | 0.81   |
| Macrovascular Invasion     |                     |        |                       |        |
| No                         | Reference           |        |                       |        |
| Yes                        | 1.90 (0.45-7.95)    | 0.389  |                       |        |
| Microvascular Invasion     |                     |        |                       |        |
| No                         | Reference           |        | Reference             |        |
| Yes                        | 2.80 (1.32-6.13)    | 0.008  | 0.83 (0.31-2.23)      | 0.712  |
| Differentiation            |                     |        |                       |        |
| High-Mid                   | Reference           |        |                       |        |
| Low                        | 1.40 (0.66-3.16)    | 0.357  |                       |        |
| CNLC Stage                 |                     |        |                       |        |
| I                          | Reference           |        | Reference             |        |
| II-III                     | 3.50 (1.64-7.56)    | 0.001  | 2.05 (0.03-149.00)    | 0.742  |
| BCLC Stage                 |                     |        |                       |        |
| 0-A                        | Reference           |        | Reference             |        |
| B-C                        | 3.50 (1.62-7.46)    | 0.001  | 1.13 (0.03-48.50)     | 0.951  |
| StepCox[forward]+RSF Model | 1.20 (1.13-1.27)    | <0.001 | 1.20 (1.11-1.30)      | <0.001 |

Abbreviations: HR, Hazard ratio; RS, Risk score; RSF, Random survival forest; AFP, Alpha-Fetal Protein; PIVKA-II, Protein induced by vitamin K absence or Antagonist-II; BCLC Stage, Barcelona clinic liver cancer stage; CNLC Stage, Chinese liver cancer stage.

**Supplementary Table 6. Baseline characteristics of patients in the Training Cohort and Test Cohort for predicting MVI in HCC patients.**

| <b>Characteristics</b> | <b>All Cohort<br/>N=86</b> | <b>Train Cohort<br/>N=53</b> | <b>Test Cohort<br/>N=33</b> | <b>P-value</b> |
|------------------------|----------------------------|------------------------------|-----------------------------|----------------|
| Age                    | 54.00<br>[47.25;65.00]     | 54.00<br>[45.00;65.00]       | 55.00<br>[48.00;65.00]      | 0.474          |
| AFP                    | 37.42<br>[6.03;345.50]     | 23.46<br>[3.80;335.00]       | 131.00<br>[10.40;425.00]    | 0.177          |
| PIVKA-II               | 132.17<br>[37.50;1252.70]  | 131.62<br>[56.33;1861.54]    | 148.22<br>[22.41;993.70]    | 0.397          |
| Tumor Size             | 4.10 [2.52;7.27]           | 4.30 [2.80;7.20]             | 3.60 [2.40;7.30]            | 0.391          |
| Gender                 |                            |                              |                             | 1.000          |
| Female                 | 19 (22.09%)                | 12 (22.64%)                  | 7 (21.21%)                  |                |
| Male                   | 67 (77.91%)                | 41 (77.36%)                  | 26 (78.79%)                 |                |
| HBV                    |                            |                              |                             | 0.990          |
| No                     | 17 (19.77%)                | 11 (20.75%)                  | 6 (18.18%)                  |                |
| Yes                    | 69 (80.23%)                | 42 (79.25%)                  | 27 (81.82%)                 |                |
| Hepatocirrhosis        |                            |                              |                             | 0.483          |
| No                     | 34 (39.53%)                | 23 (43.40%)                  | 11 (33.33%)                 |                |
| Yes                    | 52 (60.47%)                | 30 (56.60%)                  | 22 (66.67%)                 |                |
| Tumor Number           |                            |                              |                             | 0.443          |
| multiple               | 18 (20.93%)                | 13 (24.53%)                  | 5 (15.15%)                  |                |
| solitary               | 68 (79.07%)                | 40 (75.47%)                  | 28 (84.85%)                 |                |
| Macrovascular Invasion |                            |                              |                             | 0.645          |
| No                     | 81 (94.19%)                | 49 (92.45%)                  | 32 (96.97%)                 |                |
| Yes                    | 5 (5.81%)                  | 4 (7.55%)                    | 1 (3.03%)                   |                |
| Microvascular Invasion |                            |                              |                             | 1.000          |
| No                     | 49 (56.98%)                | 30 (56.60%)                  | 19 (57.58%)                 |                |
| Yes                    | 37 (43.02%)                | 23 (43.40%)                  | 14 (42.42%)                 |                |
| Differentiation        |                            |                              |                             | 0.773          |
| High-Mid               | 65 (75.58%)                | 39 (73.58%)                  | 26 (78.79%)                 |                |

|                        | <b>All Cohort</b> | <b>Train Cohort</b> | <b>Test Cohort</b> |                |
|------------------------|-------------------|---------------------|--------------------|----------------|
| <b>Characteristics</b> | <b>N=86</b>       | <b>N=53</b>         | <b>N=33</b>        | <b>P-value</b> |
| Low                    | 21 (24.42%)       | 14 (26.42%)         | 7 (21.21%)         |                |
| CNLC Stage             |                   |                     |                    | 0.261          |
| I                      | 72 (83.72%)       | 42 (79.25%)         | 30 (90.91%)        |                |
| II-III                 | 14 (16.28%)       | 11 (20.75%)         | 3 (9.09%)          |                |
| BCLC Stage             |                   |                     |                    | 0.187          |
| 0-A                    | 71 (82.56%)       | 41 (77.36%)         | 30 (90.91%)        |                |
| B-C                    | 15 (17.44%)       | 12 (22.64%)         | 3 (9.09%)          |                |

Abbreviations: HCC, Hepatocellular carcinoma; MVI, Microvascular invasion; AFP, Alpha-Fetal Protein; PIVKA-II, Protein induced by vitamin K absence or antagonist-II; BCLC Stage, Barcelona clinic liver cancer stage; CNLC Stage, Chinese liver cancer stage.

**Supplementary Table 7. Performance metrics for 10 models predicting MVI in HCC across the training cohort and test cohort.**

| Cohort          | Models | Sensitivity | Specificity | Accuracy | PPV   | NPV   | F1    | AUC   |
|-----------------|--------|-------------|-------------|----------|-------|-------|-------|-------|
| Training cohort | RF     | 1.000       | 1.000       | 1.000    | 1.000 | 1.000 | 1.000 | 1.000 |
|                 | RPART  | 0.913       | 0.533       | 0.698    | 0.600 | 0.889 | 0.724 | 0.723 |
|                 | LDA    | 1.000       | 0.600       | 0.774    | 0.657 | 1.000 | 0.793 | 0.832 |
|                 | GLM    | 0.957       | 0.667       | 0.792    | 0.687 | 0.952 | 0.800 | 0.833 |
|                 | NB     | 1.000       | 0.833       | 0.906    | 0.821 | 1.000 | 0.902 | 0.958 |
|                 | KNN    | 0.826       | 0.633       | 0.717    | 0.633 | 0.826 | 0.717 | 0.771 |
|                 | GLMNET | 0.652       | 0.833       | 0.755    | 0.750 | 0.758 | 0.698 | 0.800 |
|                 | SVM    | 1.000       | 0.867       | 0.925    | 0.852 | 1.000 | 0.920 | 0.981 |
|                 | GBM    | 0.826       | 1.000       | 0.925    | 1.000 | 0.882 | 0.905 | 0.954 |
|                 | XGB    | 1.000       | 1.000       | 1.000    | 1.000 | 1.000 | 1.000 | 1.000 |
| Test cohort     | RF     | 0.714       | 0.895       | 0.818    | 0.833 | 0.810 | 0.769 | 0.895 |
|                 | RPART  | 0.857       | 0.368       | 0.576    | 0.500 | 0.778 | 0.632 | 0.613 |
|                 | LDA    | 0.857       | 0.474       | 0.636    | 0.545 | 0.818 | 0.667 | 0.808 |
|                 | GLM    | 0.929       | 0.579       | 0.727    | 0.619 | 0.917 | 0.743 | 0.842 |
|                 | NB     | 0.857       | 0.526       | 0.667    | 0.571 | 0.833 | 0.686 | 0.865 |
|                 | KNN    | 0.714       | 0.632       | 0.667    | 0.588 | 0.750 | 0.645 | 0.814 |
|                 | GLMNET | 0.714       | 0.842       | 0.788    | 0.769 | 0.800 | 0.741 | 0.805 |
|                 | SVM    | 0.857       | 0.842       | 0.848    | 0.800 | 0.889 | 0.828 | 0.921 |
|                 | GBM    | 0.714       | 0.895       | 0.818    | 0.833 | 0.810 | 0.769 | 0.816 |
|                 | XGB    | 0.786       | 0.842       | 0.818    | 0.786 | 0.842 | 0.786 | 0.895 |

Abbreviations: HCC, Hepatocellular carcinoma; MVI, Microvascular invasion; XGB, XGBoost; RF, Random Forest; SVM, Support Vector Machine; NB, Naive Bayes; GBM, Gradient Boosting Machine; GLM, Generalized Linear Models; GLMNET, Generalized Linear Models with Elastic-Net; LDA, Linear Discriminant Analysis; KNN, k-Nearest Neighbors; RPART, Recursive Partitioning Tree; PPV, Positive Predictive Value; NPV, Negative Predictive Value.

**Supplementary Figure 1. Box plot comparing age (A) and proportion plot comparing gender (B) between HCC patients and healthy controls showed no significant differences.**

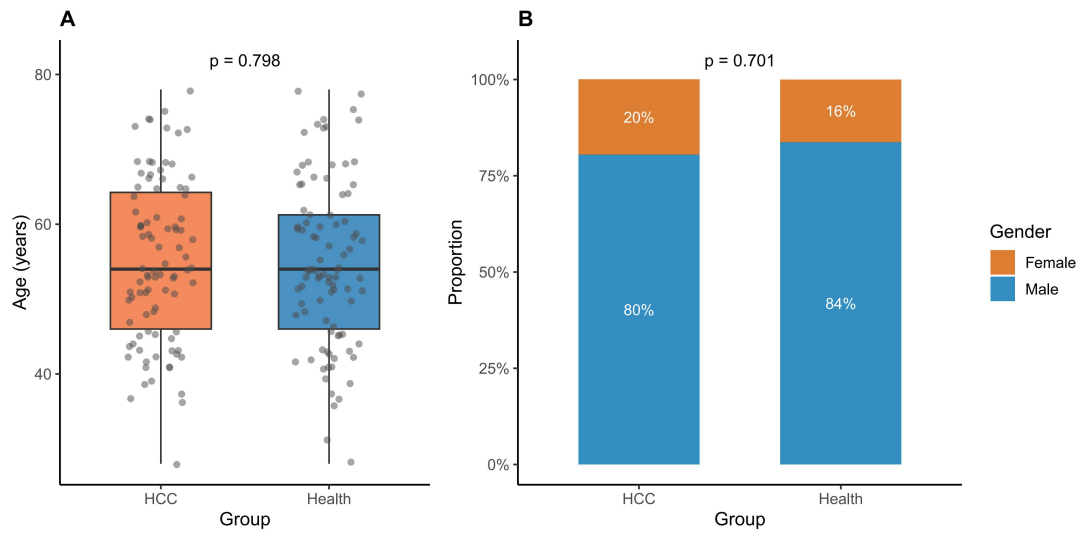

Abbreviation: HCC, Hepatocellular carcinoma.

**Supplementary Figure 2. Line chart of performance metrics for 10 models predicting MVI in HCC across the training cohort (A) and test cohort (B).**

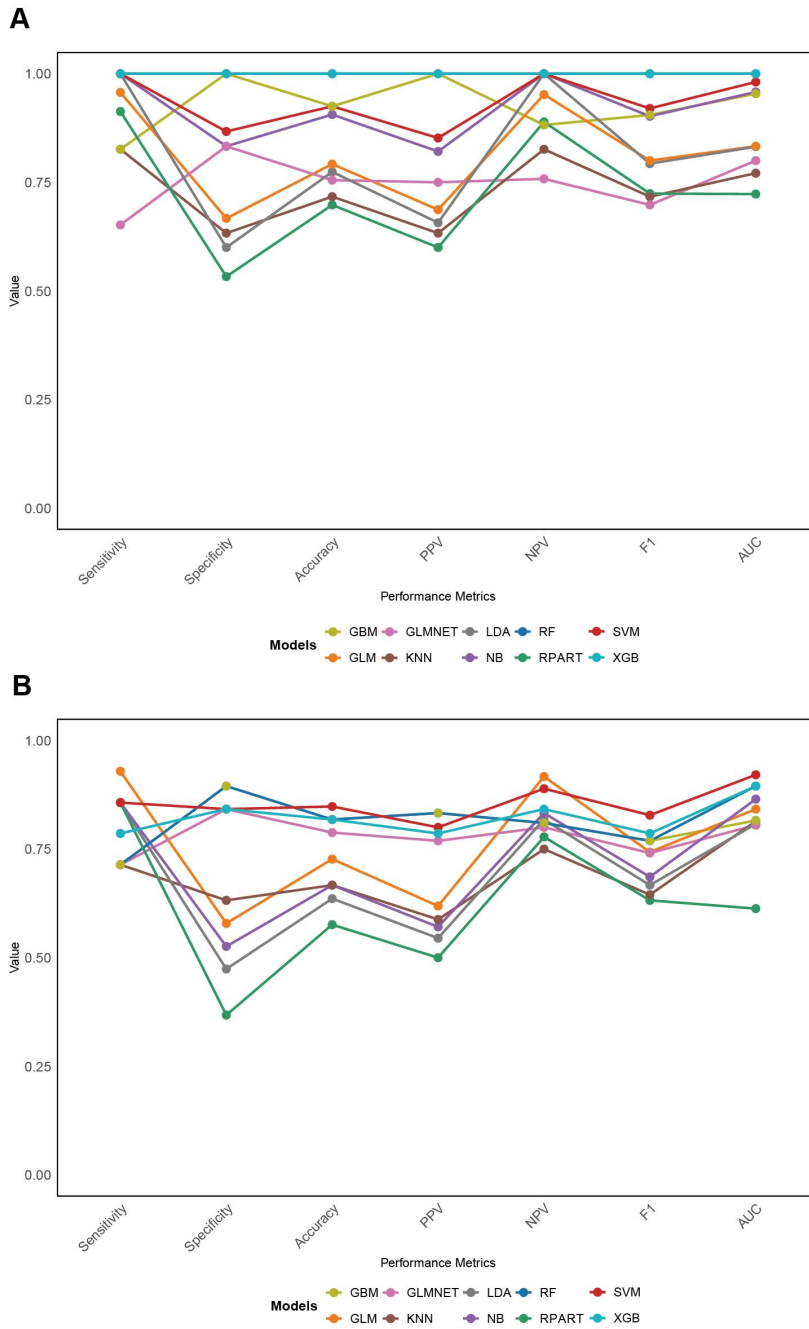

Abbreviations: HCC, Hepatocellular carcinoma; MVI, Microvascular invasion; RF, Random forest; SVM, Support vector machine; NB, Naïve bayes; GBM, Gradient boosting machine; GLM, Generalized linear model; GLMNET, Generalized linear model with elastic-net; LDA, Linear discriminant analysis; KNN, k-nearest neighbors; RPART, Recursive partitioning tree; PPV, Positive predictive value; NPV, Negative predictive value.

**Supplementary Figure 3. SHAP Dependency plot for V2FC (A), H2FC (B), N, N-dimethylglycine (C), H1FC (D), lactic acid (E), creatine (F), and pyruvic acid (G) of the SVM Model to predict MVI in HCC.**

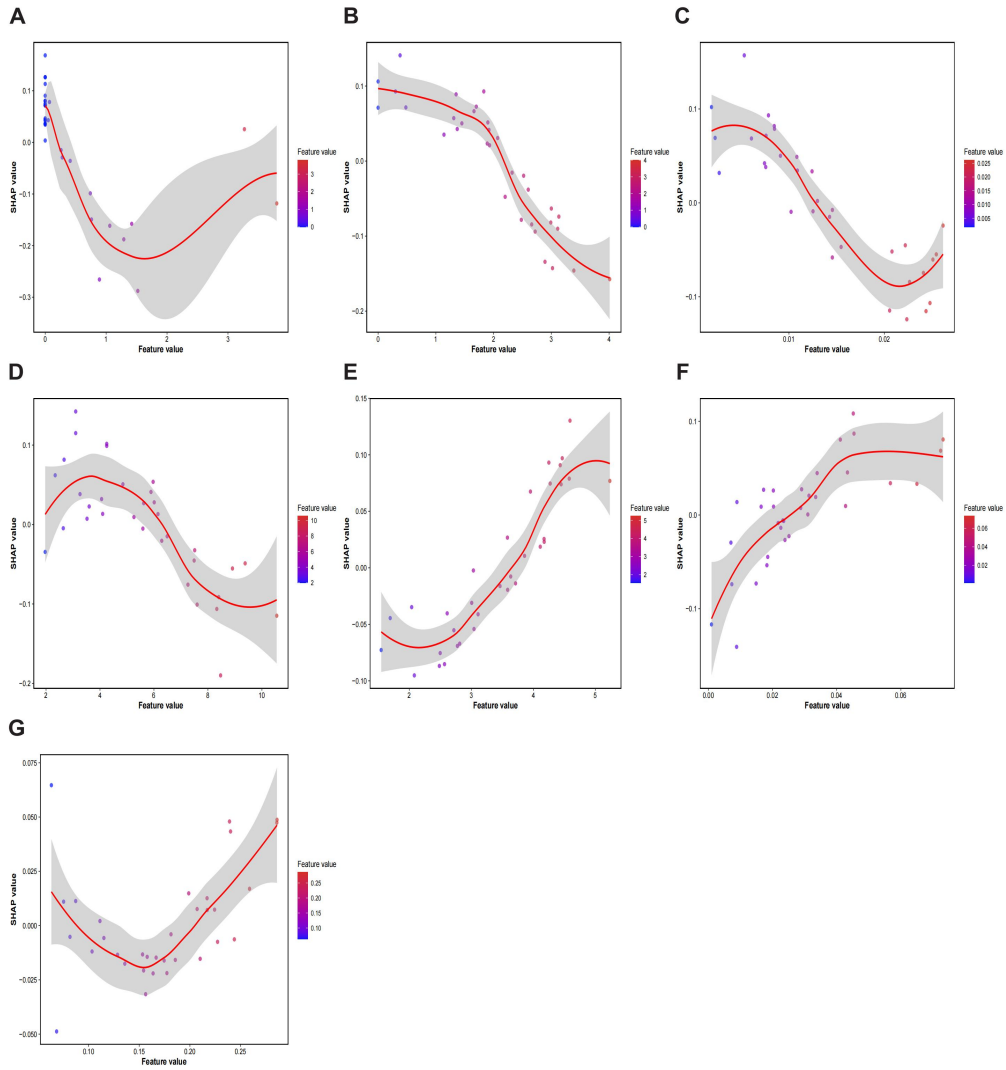

Abbreviations: HCC, Hepatocellular carcinoma; MVI, Microvascular invasion; SHAP, SHapley Additive exPlanations; V2FC, VLDL-2 free cholesterol; H2FC, HDL-2 free cholesterol; H1FC, HDL-1 free cholesterol.
